# Supplementary material for: Human Primary Astrocytes Differently Respond to Pro- and Anti-Inflammatory Stimuli
Source: MDPI journal article supplement (doi:10.3390/biomedicines10081769), 2022-07-22
Supplement: s1 [file s1]

A)

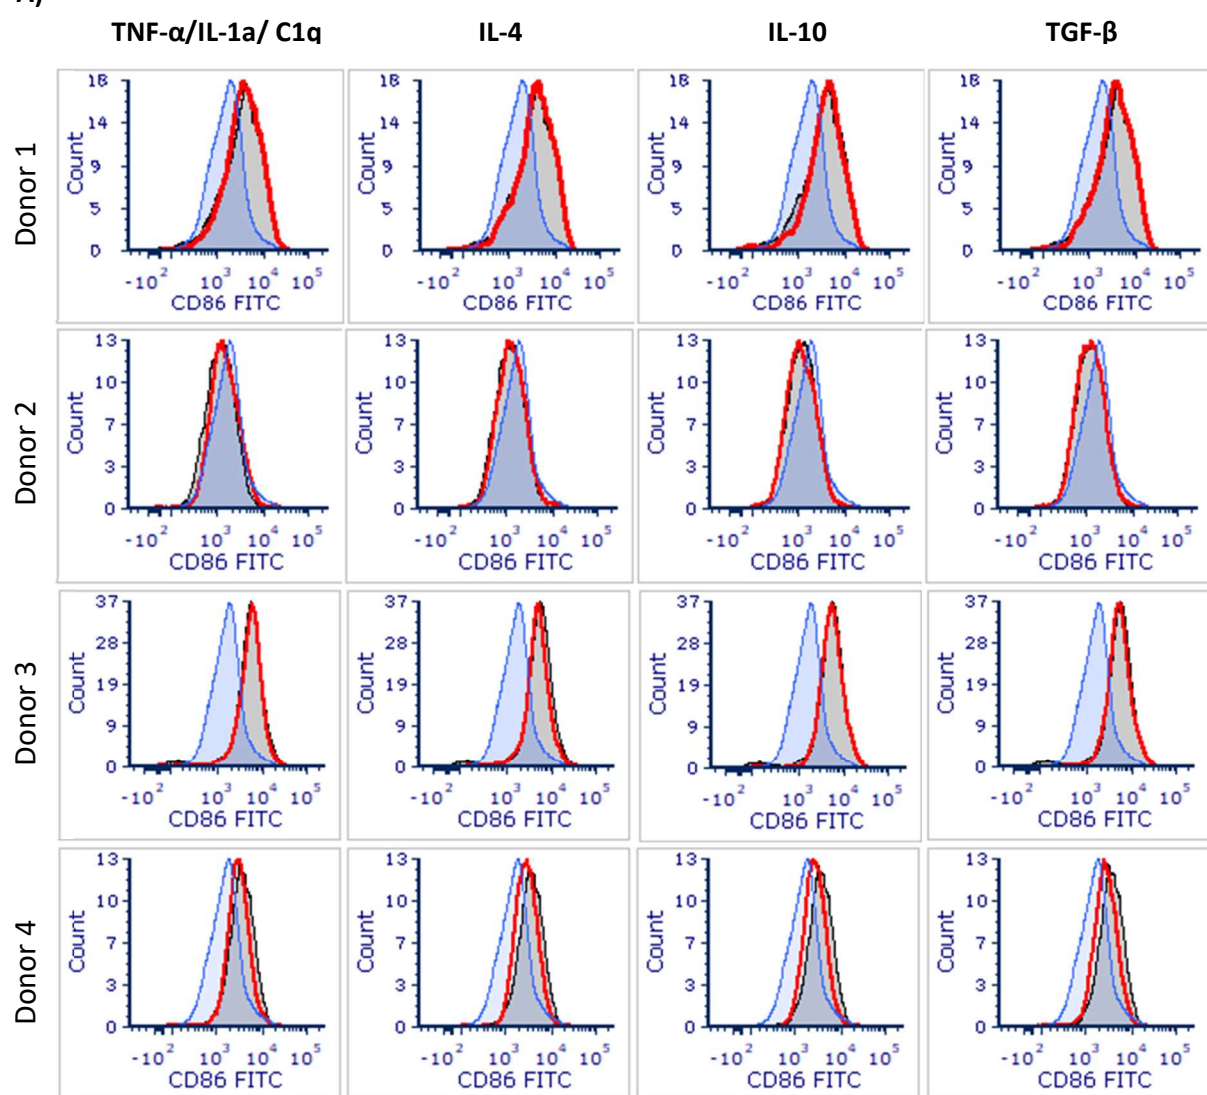

B)

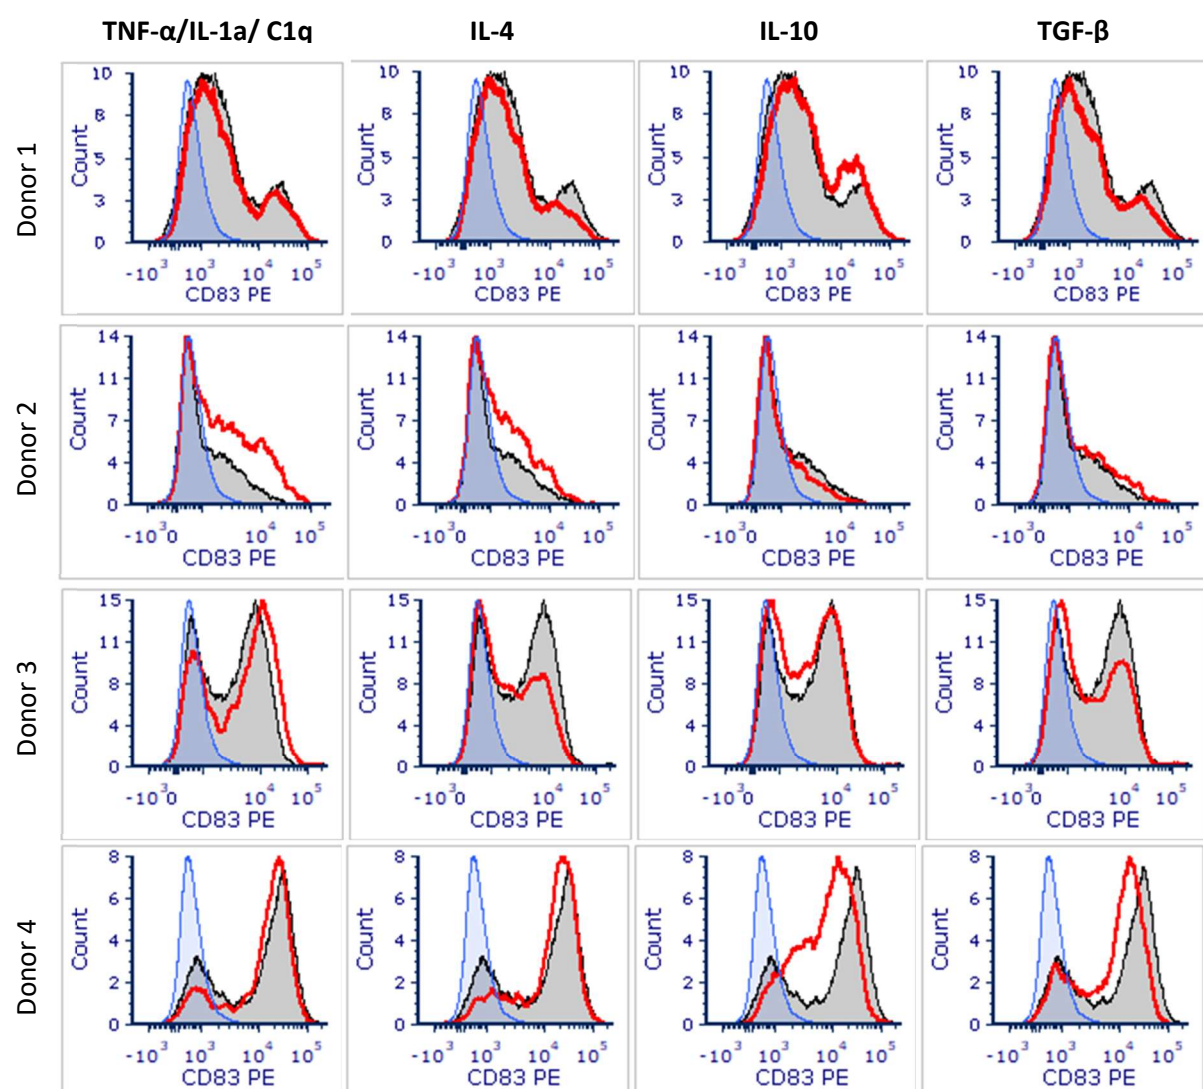

c)

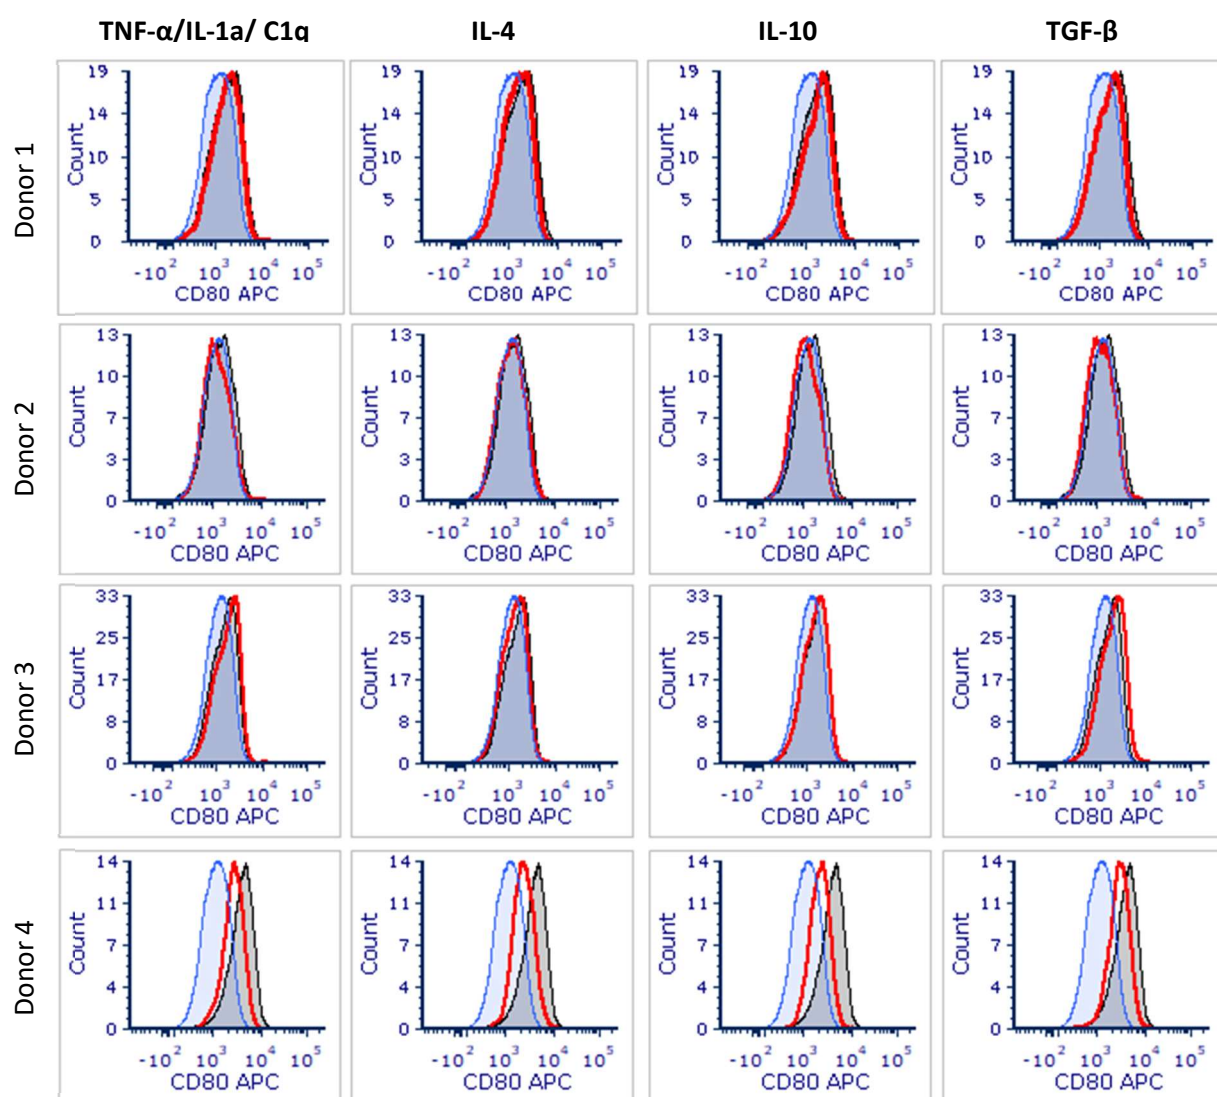

D)

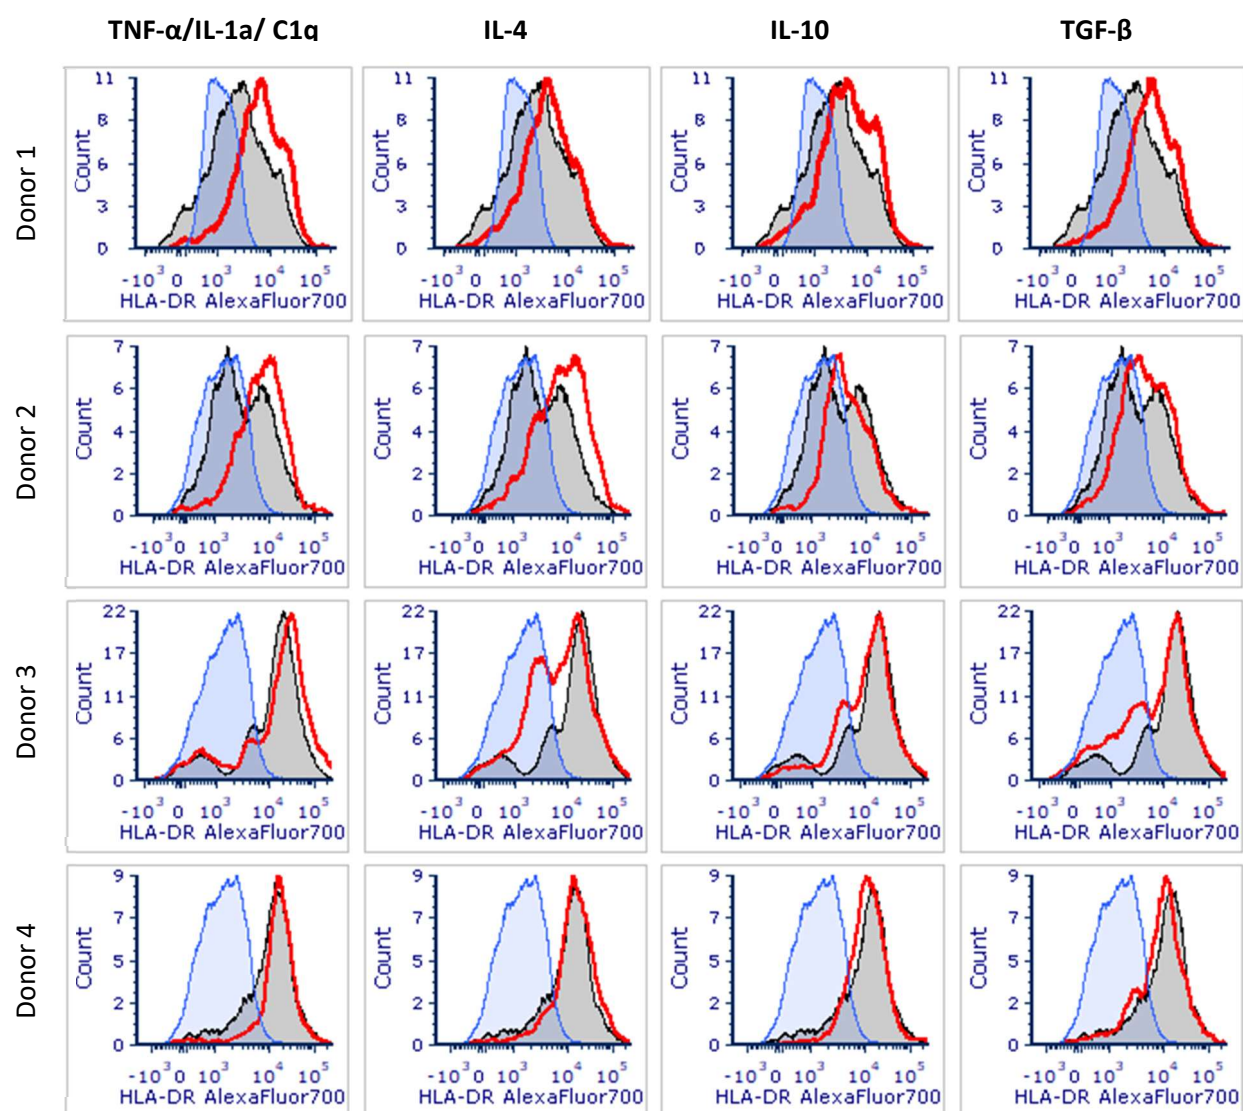

**Supplementary Figure S1.** Expression of surface co-stimulatory molecules: CD86 (A), CD83 (B), CD80 (C) and HLA-DR (D) on astrocyte cells in response to various cytokine environment. Representative histograms for 4 astrocyte's donors. Blue-filled histograms represent cells stained with isotype control antibodies, grey-filled histograms represent molecule expression on astrocytes grown in non-stimulatory conditions (culture medium), red-line histograms represent molecule expression on astrocytes grown in cytokine-enriched conditions.
